# Supplementary material for: A Novel In Vivo Infection Model To Study Papillomavirus-Mediated Disease of the Female Reproductive Tract
Source: PubMed Central journal article supplement (PMC6401479; doi:10.1128/mbio.00180-19), 2019-03-05

Figure S3

A.

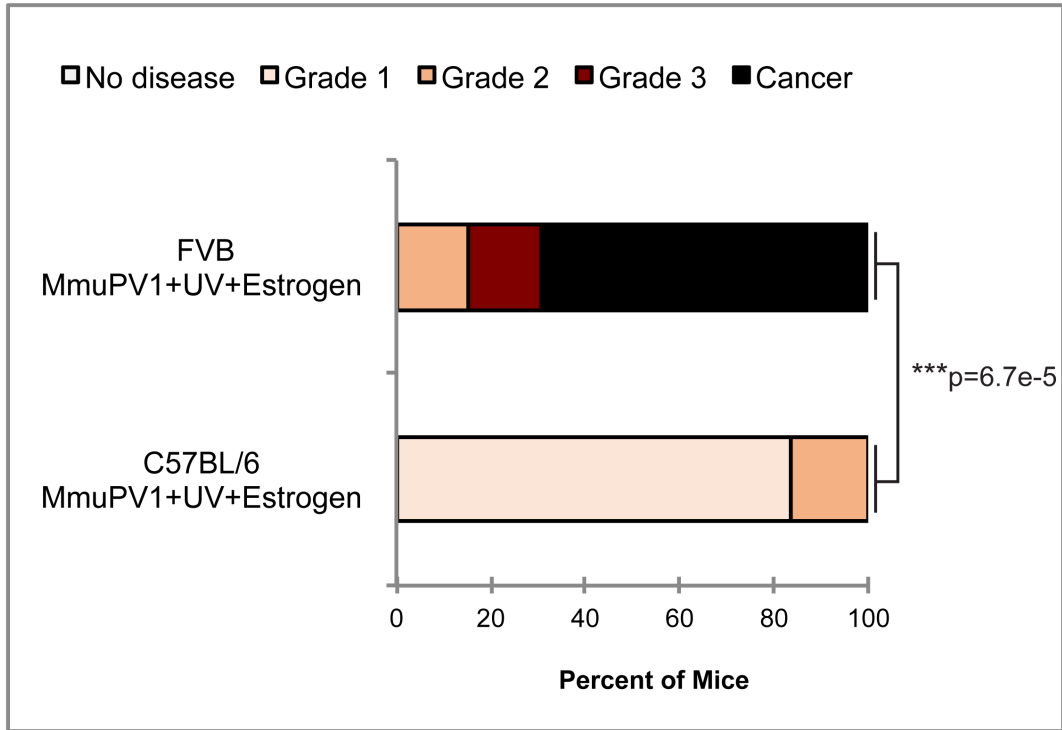

B.

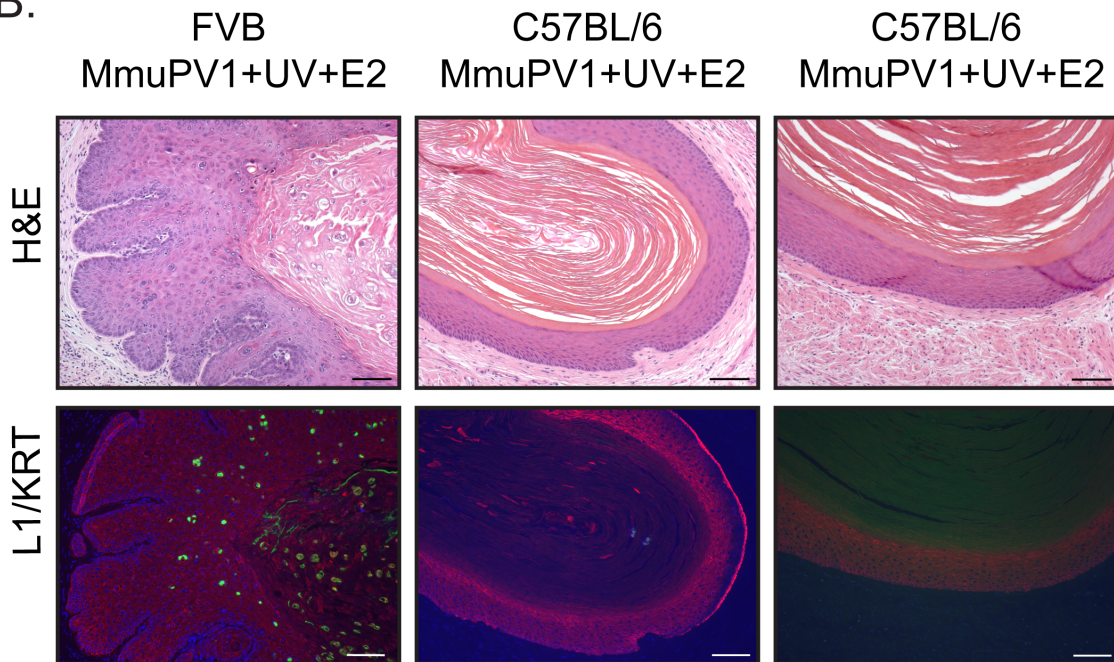

Supplement: mBio.00180-19-sf003.pdf [file mBio.00180-19-sf003.pdf]
